# Supplementary material for: Inheritance Rights of Adopted Children in Islam: A Systematic Review of Principles, Legal Foundations, and Practices
Source: Research Square preprint supplement (doi:10.21203/rs.3.rs-7957048/v1), 2025-12-01
Supplement: Supplementary file 1 [file 2878f5bd74b5094ae8655189.docx]

**Results of Quality Assessment with MMAT**

| Author (Tahun) | S1 | S2 | Criterion 1 | Criterion 2 | Criterion 3 | Criterion 4 | Criterion 5 |
| --- | --- | --- | --- | --- | --- | --- | --- |
| Hossain & Jamil (2022) | Yes | Yes | Yes | Yes | Yes | Yes | Yes |
| Mirsultan (2020) | Yes | Yes | Yes | Yes | Yes | Yes | Yes |
| Leonard (2024) | Yes | Yes | Yes | Yes | Yes | Yes | Yes |
| Muniroh & Nasution (2021) | Yes | Yes | Yes | Yes | Yes | Yes | Yes |
| Rubab, Malik, & Aziz (2023) | Yes | Yes | Yes | Yes | Yes | Yes | Yes |
| Haseeb Fatima (2024) | Yes | Yes | Yes | Yes | Yes | Yes | Yes |
| Fatahullah et al. (2025) | Yes | Yes | Yes | Yes | Yes | Can't Tell | Can't Tell |
| MH Sungay (2024) | Yes | Yes | Yes | Yes | Yes | Yes | Yes |
| Zainuddin et al. (2022) | Yes | Yes | Yes | Yes | Can't Tell | Yes | Yes |
| Assaad & Hasyim (2020) | Yes | Yes | Yes | Can't Tell | Can't Tell | Yes | Yes |
| Sungay (2022) | Yes | Yes | Yes | Yes | Yes | Can't Tell | Yes |
| Sopyan et al. (2020) | Yes | Yes | Yes | Yes | Yes | Yes | Yes |
| Lubis et al. (2025) | Yes | Yes | Yes | Yes | Yes | Yes | Yes |
| Kusmayanti et al. (2023) | Yes | Yes | Yes | Yes | Can't Tell | Can't Tell | Yes |
| Ilyas et al. (2023) | Yes | Yes | Yes | Yes | Yes | Yes | Yes |
| Ismail et al. (2022) | Yes | Yes | Yes | Yes | Yes | Yes | Yes |
| Khedher (2017) | Yes | Yes | Yes | Yes | Yes | Yes | Yes |
