# Supplementary material for: Inheritance Rights of Adopted Children in Islam: A Systematic Review of Principles, Legal Foundations, and Practices
Source: Research Square preprint supplement (doi:10.21203/rs.3.rs-7957048/v1), 2025-12-01
Supplement: Supplementary file 2 [file 5e423057b825bd0f27afa3a5.docx]

**Extraction Results of 17 Selected Articles**

| Author (Year) | Title | Design Study | Country | Research Objectives | Findings | General Principles | Legal Basis | Practice |
| --- | --- | --- | --- | --- | --- | --- | --- | --- |
| Hossain & Jamil (2022) | Equality in contention: exploring the debates of gender-equal inheritance rights in Bangladesh | Qualitative Study | Bangladesh | A rigorous examination of the underlying causes of debate and confusion in the formulation of gender-equal inheritance policies is imperative. Furthermore, it is essential to identify and analyse the socio-political factors that impede the adoption of such policies. | Controversies between Islamic law and national/international policies gave rise to serious debates; however, institutional factors and religious sentiments hindered the reform of gender-equal inheritance law. | The prerogative pertaining to inheritance rights is determined by religion-based personal laws. However, gender-equal reforms are regarded as being incongruent with the principles of sharia by conservative groups. | The governance of inheritance law is predicated on the principles of Islamic and Hindu personal laws, a situation which is in direct contravention of the constitutional principles of gender equality as espoused by Bangladesh. | Women frequently fail to receive their rightful share of inheritance due to social and cultural pressures that result in a neglect of their formal rights. |
| Mirsultan (2020) | Divorce settlement among the Uyghurs during the Republican era in Xinjiang | Qualitative Study | China (Xinjiang) | The practice of divorce and Islamic family law among the Uyghur community in the Republic of China era will be analysed using local legal documents. | Islamic law (Hanafi school) continues to be applied in divorce, inheritance and adoption in Xinjiang, with legal pluralism being exhibited alongside interference from customary and state law. | Adopted children (in the form of baliliq) are regarded as a form of service or dependents, rather than legal heirs by blood. | In accordance with the principles of Hanafi sharia law, the entitlement of adopted children to inheritance is subject to the provision of grants or wills. | Adopted children from impoverished backgrounds are often placed with affluent families, yet they are not accorded the same legal rights as their biological relatives. Instead, their protection is limited to guardianship and maintenance. |
| Leonard (2024) | Inheritance, Marriage and Adoption: Changing Judicial Practices in Hyderabad State | Qualitative Study | India (Hyderabad) | The present study will examine the evolution of inheritance, adoption and marriage law practices in Hyderabad by tracing judicial cases from the British colonial period. | In the context of Hindu law, adoption is a recognised legal practice in Hyderabad, with legal recognition being granted. Within the Muslim community, adoption is a prevalent practice, however, it does not automatically entail the conferral of legal inheritance rights, except under specific circumstances outlined by law or attestation. | In Islamic law, adoption does not establish a nasab relationship and does not necessarily confer inheritance rights; these rights are only granted through a grant or will. | The Hyderabad court applies both Islamic and Hindu legal standards; adoption is recognised for Hinduism but not automatically in Islam. | In the context of the Muslim community in Hyderabad, child adoption does not entail the automatic conferral of inheritance rights, unless specifically granted or decreed by the relevant authorities. Conversely, in the Hindu community, adoption of children is recognised under the law and is accompanied by the entitlements to inheritance rights. |
| Muniroh & Nasution (2021) | The Adoption of Found Child According to Islamic Law and Law No. 3 of 2006 on Religious Courts in the Perspective of Maqasid Al-Shari'ah | Qualitative Study | Indonesia | The present study will analyse the legal impact on the status of adopted children from the perspective of maqāṣid al-sharī'ah and its relevance to the development of Islamic law in Indonesia. | Adopted children are not entitled to inheritance by nasab, but can obtain inheritance through mandatory wills; adoption is regarded as a form of protection in the context of maslahat. | The adoption of children does not result in any alteration to the concept of nasab; the legal status of adopted children is that of orphans, and they are granted protection on the basis of maslahat. | Drawing upon the principles of maqāṣid al-sharī'ah and the legal framework established by Law No. 3/2006, the issue of compulsory bequests to adopted children from their adoptive parents is addressed. | The legal and social framework governing the status of adopted children encompasses various aspects, including the provision of guardianship and education by the adoptive parents. However, it should be noted that the issue of inheritance rights is not encompassed within this framework, except in circumstances stipulated by mandatory wills. |
| Rubab, Malik, & Aziz (2023) | Do Legal and Institutional Reforms in Punjab, Pakistan Protect Women’s Inherited Land Rights? | Qualitative Study | Pakistan (Punjab) | The present study will analyse the effectiveness of legal and institutional reforms in protecting women's inheritance rights in Punjab, Pakistan, using a feminist-socialist approach. | Notwithstanding the implementation of legal reforms, the prevailing institutional patriarchy and the pervasive cultural barriers continue to impede women's access to their inheritance rights. | Islam and the Pakistani constitution both guarantee women's inheritance rights; however, the implementation of these rights is impeded by patriarchal values and structural constraints. | The legislation enacted in 2011 prohibits the denial of women's inheritance rights, with reforms including the digitisation of land documents and the strengthening of inheritance laws. | Despite the existence of favourable legislation, in practice many women still do not receive inheritance rights due to family pressure, low legal literacy, and bureaucratic barriers. |
| Haseeb Fatima (2024) | A Critical Appraisal of Obligatory Bequest as Prevalent in Muslim Countries | Qualitative Study | Pakistan | The concept of compulsory testament as a form of reform of Islamic inheritance law in various Muslim countries must be analysed. | Compulsory bequests have been shown to offer a safeguard for orphaned grandchildren against the potential inequities of conventional inheritance legislation. | The provision ensures the safeguarding of inheritance rights for grandchildren in the event of the premature death of their parents. | Contemporary ijtihad is informed by the maqashid of sharia, minority madhhab perspectives, and the practices of nations such as Egypt and Pakistan. | If there's no will, the court decides how to distribute the inheritance; if there is, the shar'i portion of the inheritance applies. |
| Fatahullah et al. (2025) | Reform of Islamic Inheritance Law: The Influence of Customary Law on the Institution of Mandatory Bequest in Islamic Law | Qualitative Study | Indonesia | The following discourse aims to elucidate the impact of customary law on the reform of the concept of mandatory bequest in Indonesian Islamic inheritance law. | Wasiat wajibah is employed as a solution to accommodate the rights of adopted children who are not recognised as heirs. | The present study explores the notion of providing justice to adopted children through the provision of inheritance shares, despite the fact that they are not biological heirs. | The present article explores the question of whether maqashid sharia can be considered to provide moral-legal legitimacy, as set out in Article 209 of the Compilation of Islamic Law. | The rights of adopted children are realised through a judge's decision, with a maximum allocation of one-third of the share. |
| MH Sungay (2024) | To Bequeath or not to Bequeath? A South African Law Analysis of the 'Problematic Areas' Found in the Islamic Law of Intestate Succession | Qualitative Study | South Africa | A rigorous examination of the disparities in Islamic inheritance legislation pertaining to adopted and extramarital children, along with the legal remedies available to address these inequities, is imperative. | The differences in context between Islamic law and South African law must be analysed as a basis for testamentary reform. | In Islamic inheritance law , adopted children are not included as heirs. | In the Qur'an Surah An-Nisa' and the Hadith, the prohibition of bequeathing to heirs except by will and with the consent of other heirs is clearly articulated. | The maximum proportion of the property that may be bequeathed is one-third. |
| Zainuddin et al. (2022) | Compulsory Testament: Efforts to Protect and Fulfil the Welfare Rights of Adopted Children in Indonesia’s Islamic Inheritance System | Qualitative Study | Indonesia | The present study investigates the role of the mandatory will as a safeguard for the welfare rights of adopted children within the context of Indonesian Islamic inheritance law. | Wasiat wajibah provides a maslahat solution for the protection of adopted children, both legally and socially. | The rights bestowed upon adopted children are predicated on the assumption that they possess social ties and a nurturing environment. | The present study sets out the results of research conducted by Indonesian scholars on ijtihad, with particular reference to maslahah, maqashid sharia, and Q.S. Al-Baqarah: 180. | The allocation of inheritance rights is determined by a judicial decision, which is made on the basis of the welfare requirements of the adopted child. |
| Assaad & Hasyim (2020) | Judges Decisions of Makassar, Palopo, and Masamba Religious Court Over the Islamic Inheritance Law | Qualitative Study | Indonesia | The present study will analyse the ijtihad method of judges in resolving inheritance cases, including cases of adopted children and grandchildren. | The judge's decision demonstrates the adaptability of Islamic law, particularly in the context of ijtihad, in determining the distribution of shares to adopted children and grandchildren. | The magistrate's ruling constituted a judicial response to the prevailing circumstances, whereby shares were bequeathed to grandchildren and adopted children, thereby illustrating a strategic judicial adaptation to the specific local context. | The decision was arrived at through a process of ijtihad, maqashid sharia, and reinterpretation of KHI. | The legal framework pertaining to the inheritance rights of adopted children is enshrined in provisions such as mandatory wills and grants. These provisions collectively entail the allocation of a third of the share of inheritance rights to such children. |
| Sungay (2022) | Constitutional Legitimacy of Islamic Law of Wills in South Africa | Juridical Normative | South Africa | The present study will examine the constitutionality of Islamic probate law within the South African legal system. | Islamic probate law is recognised by the community, despite its limited constitutional legitimacy. | It is imperative to acknowledge the significance of the right to probate within the context of a plural legal framework, particularly within the context of the Muslim community. | The South African Constitution and the principle of freedom of religion. | The implementation of Islamic probate is a matter of communal consensus rather than statutory obligation. |
| Sopyan et al. (2020) | Degradation of Customary Inheritance Law in The Sai Batin Lampung Tribe | Qualitative Study | Indonesia | The present study analyses the shift from customary inheritance law to Islamic inheritance law among Sai Batin. | It is evident that the majorate customary inheritance system is undergoing a gradual transition towards the Islamic system, driven by the pursuit of justice and fairness. | The distribution of inheritance amongst adopted children is a matter of greater acceptance than the majorate system. | The process by which local communities adapt to Islamic inheritance law. | It is evident that parents frequently utilise grants or the Islamic system of inheritance, encompassing adopted children. |
| Lubis et al. (2025) | Reconstruction of Obligatory Bequest in the Perspective of the Objectives of Islamic Law | Qualitative Study | Indonesia | The reconstruction of the concept of compulsory bequest is to be approached inclusively through the lens of maqāṣid al-sharīʿah. | The concept of compulsory bequest has been extended to encompass adopted children, extramarital children, and illegitimate wives. | The present study explores the legal framework surrounding the protection of the rights of children who are not included as formal heirs. | In accordance with Article 209 of the KHI, the principle of maqāṣid al-sharīʿah is a fundamental component of jurisprudence. | The present study explores the expansion of mandatory wills to encompass adopted children, as determined by religious court decisions. |
| Kusmayanti et al. (2023) | Judges' Acceptance of Sharia-Inspired Laws in Indonesia | Juridical Normative | Indonesia (Aceh) | An examination of the acceptance of sharia-inspired customary law by judges. | In the context of Aceh, the legal framework pertaining to adoption stipulates that adopted children are not entitled to direct inheritance rights. Instead, they are granted the right to receive wills and testaments. | The legal rights pertaining to inheritance in the context of adopted children are not congruent with those of their biological offspring. The exclusive means through which these rights can be recognised is through the instrument of wills wajibah. | The decision of the Aceh Sharia Court is hereby presented for consideration. | It is evident that judges do not accept adat if it contradicts Islamic law. Furthermore, it has been established that adopted children do not inherit. |
| Ilyas et al. (2023) | The Accommodation of Customary Law to Islamic Law Distribution of Inheritance in Aceh | Empirical Study | Indonesia (Aceh) | The following essay will reveal the form of accommodation of customary law in Islamic law related to inheritance. | In the Islamic legal system, the concept of accommodation of custom plays a pivotal role in the legal recognition of adopted children, who are entrusted with mandatory wills within the framework of a pluralistic system. | The question of how customary law is accommodated in Islam is of particular interest in the context of achieving justice and meeting social reality. | This paper sets out to explore the relationship between Aceh's customary practices and maqāṣid al-sharīʿah. | Wasiat wajibah functions as an accommodative bridge between adat and Islamic fiqh for adopted children |
| Ismail et al. (2022) | The Contribution of ‘Urf to the Reform of Islamic Inheritance Law in Indonesia | Qualitative Study | Indonesia | The discourse aims to elucidate the position and contribution of 'urf in the reform of Islamic inheritance law in Indonesia. | Urf plays an instrumental role in the establishment of KHI provisions pertinent to the inheritance of adopted children, zawul arḥām, radd, walad, joint property, and substitute heirs. | The adoption of children does not result in automatic inheritance; rather, this right is granted through a mandatory will, representing a compromise between the principles of classical fiqh and the prevailing social realities. | Article 209 KHI is based on 'urf, as well as on the principles of siyasah shar'iyyah and al-maṣlaḥah al-mursalah. | In the absence of an ordinary will from the adoptive parents, the application of compulsory bequest is limited to a maximum of one-third of the assets. |
| Khedher (2017) | Tracing the Development of the Tunisian 1956 Code of Personal Status | Qualitative Study | Tunisia | The historical, social and political background of the establishment of the 1956 Tunisian Personal Status Code, and its implications for women's rights, will be traced. | The 1956 Code saw the abolition of polygamy and unilateral divorce, and the establishment of equal rights in marriage and divorce. Furthermore, women were granted wider legal rights, including in the areas of inheritance and adoption. | The Tunisian family law is to be reformed through a reinterpretation of sharia in order to ensure gender justice, including the recognition of adopted children. | The Tunisian Personal Status Code (1956) was established on the basis of a reinterpretation of Maliki fiqh and the principle of contextualised ijtihad. | Adopted children are granted civil rights, including the right of inheritance, through the recognition of modern civil law that does not contradict the spirit of Islam. |
